# Supplementary material for: Biomarkers of Primary Resistance to Trastuzumab in HER2-Positive Metastatic Gastric Cancer Patients: the AMNESIA Case-Control Study
Source: Oxford University Press journal article supplement (doi:10.1158/1078-0432.ccr-17-2781), 2017-12-05
Supplement: 10780432ccr172781-sup-189743_3_supp_4405436_yzrxd8.docx [file 10780432ccr172781-sup-189743_3_supp_4405436_yzrxd8.docx]

**Supplementary Table 1.** Prevalence of alterations not included in the AMNESIA panel, reported by means of NGS from resistant (cases) *versus* sensitive (controls) patients.

| **Mutated gene** | **Resistant patients**  **N=20** | **Sensitive patients**  **N=17** |
| --- | --- | --- |
| ***ALK*** | **1** | **0** |
|  | C1182Y |  |
| ***APC*** | **1** | **2** |
|  | p.Glu1353Ter | | p.Glu1464ValfsTer8 | | --- | |
|  |  | L1564* |
| ***ATM*** | **1** | **0** |
|  | P3050L |  |
| ***BRAF* (V600E)** | **1** | **0** |
| ***BRAF* (non V600E)** | **0** | **1** |
|  |  | D594N |
| ***CDKN2A*** | **0** | **1** |
|  |  | R80* |
| ***CTNNB1*** | **0** | **1** |
|  |  | D32N |
| ***ERBB2*** | **1** | **1** |
|  | D769Y | G776V |
| ***FBXW7*** | **2** | **0** |
|  | R465C |  |
|  | R479L |  |
| ***KDR*** | **1** | **0** |
|  | L889F |  |
| ***KIT*** | **0** | **1** |
|  |  | H630R |
| ***SMAD4*** | **2** | **0** |
|  | Q180* |  |
|  | P356H |  |
| ***SMO*** | **1** | **0** |
|  | V414M |  |
| ***SRC*** | **1** | **0** |
|  | E507QQ |  |
| ***TP53*** | **13** | **10** |
|  | p.Leu93CysfsTer30 | C135F |
|  | A138V | T170M |
|  | p.His168_Met169dup | R175H + R273C |
|  | R175H (3) | R273H |
|  | p.Phe212TrpfsTer31 | R280S |
|  | R213* | R282W |
|  | R248W | V173M |
|  | I255F | R342Stop |
|  | R282W | p.Leu93_Tyr103del |
|  | E286Q  p.Cys242AlafsTer5 | p.Cys242LeufsTer22 |
